# Supplementary material for: Antimicrobial and antioxidant activities of Streptomyces species from soils of three different cold sites in the Fez-Meknes region Morocco
Source: PubMed Central journal article supplement (PMC9568536; doi:10.1038/s41598-022-21644-z), 2022-10-14
Supplement: 41598_2022_21644_MOESM1_ESM.pdf [file 41598_2022_21644_MOESM1_ESM.pdf]

**Antimicrobial and antioxidant activities of *Streptomyces* species from soils of three different cold sites in the Fez-Meknes region Morocco**

Said Rammali<sup>a,\*</sup>, Lahoucine Hilali<sup>a</sup>, Khadija Dari<sup>a</sup>, Bouchaib Bencharki<sup>a</sup>, Abdellatif Rahim<sup>b</sup>, Mohammed Timinouni<sup>c</sup>, Fatima Gaboune<sup>d</sup>, Mohamed El Aalaoui<sup>e</sup>, Abdelkrim khattabi<sup>a</sup>

<sup>a</sup>Laboratory of Agro-Alimentary and Health, Faculty of Sciences and Techniques, Hassan First University of Settat, B.P. 539, Settat 26000, Morocco

<sup>b</sup>Laboratory of Biochemistry, Neurosciences, Natural Ressources and Environment, Faculty of Sciences and Techniques, Hassan First University of Settat, B.P. 539, Settat 26000, Morocco

<sup>c</sup>Molecular Bacteriology Laboratory, Institut Pasteur du Maroc, Casablanca, Morocco

<sup>d</sup>National Institute of Agronomic Research of Rabat, Morocco

<sup>e</sup>Regional Center of Agronomic Research of Settat, Tertiary Road 1406, At 5 Km from Settat, Settat 26400, Morocco

\* Corresponding authors:

[s.ammali@uhp.ac.ma](mailto:s.ammali@uhp.ac.ma) / [ammali\\_fst@hotmail.fr](mailto:ammali_fst@hotmail.fr) (Said RAMMALI)

## SUMMARY

### 1. General methods

|                                                                   |   |
|-------------------------------------------------------------------|---|
| 1.1 Recommended media for <i>Actinomyces</i> isolation.....       | 3 |
| 1.2 Recommended media for testing antimicrobial activity.....     | 3 |
| 1.3 Recommended medium for testing NaCl tolerance.....            | 3 |
| 1.4 Recommended medium for the production of melanin pigment..... | 4 |
| 1.5 Other media used in this study.....                           | 4 |

### 2. Supplementary figures

|                                                                                                                                                                                                                                                   |    |
|---------------------------------------------------------------------------------------------------------------------------------------------------------------------------------------------------------------------------------------------------|----|
| Figure S1. Analysis of minerals using SEM.....                                                                                                                                                                                                    | 5  |
| Figure S2. Production kinetics of antibiotics against <i>Bacillus cereus</i> ATCC 14579.....                                                                                                                                                      | 6  |
| Figure S3. Microscopic aspect of the most active <i>Streptomyces</i> (Gram stain).....                                                                                                                                                            | 7  |
| Figure S4. Morphological aspect of the colonies of five isolates of active <i>Streptomyces</i> .....                                                                                                                                              | 8  |
| Figure S5. GC-MS of dichloromethane extract of E23-4 OM883990 strain with peaks indicating the presence of bioactive compounds (according to the NIST database).....                                                                              | 9  |
| Figure S6. Chemical structures of 21 secondary metabolites present in dichloromethane extract of E23-4 OM883990 strain analyzed by GC-MS.....                                                                                                     | 14 |
| Figure S7. A map of the sampling sites retrieved from Google Maps (Google Maps. Map Data ©2022. Retrieved from <a href="https://www.google.com/maps/@32.9937363,-7.6005892,15z">https://www.google.com/maps/@32.9937363,-7.6005892,15z</a> )..... | 15 |
| Figure S8. <i>Actinomyces</i> isolates obtained in the three sites (A, B, and C) according to their culture media.....                                                                                                                            | 16 |
| Figure S9. Determination of the extracted DNA by Nanodrop 8000.....                                                                                                                                                                               | 17 |
| Figure S10. Agarose gel electrophoresis for amplification of genes coding for 16S rRNA of <i>Actinomyces</i> strains.....                                                                                                                         | 19 |
| Figure S11. Chemical structures of secondary metabolites present in DM E23-4 extract of <i>Streptomyces</i> sp. strain analyzed by GC-MS.....                                                                                                     | 20 |

### 3. Supplementary tables

|                                                                                                                                                                       |    |
|-----------------------------------------------------------------------------------------------------------------------------------------------------------------------|----|
| Supplementary Table 1. Morphological characteristics of active <i>Streptomyces</i> isolates.....                                                                      | 21 |
| Supplementary Table 2. Molecular identification of the 11 selected <i>Actinomyces</i> isolates based on 16S rRNA gene sequencing.....                                 | 22 |
| Supplementary Table 3. Spearman correlation between soil physico-chemical parameters and total number of <i>Streptomyces</i> (TNS) in the three sites A, B and C..... | 23 |
| Supplementary Table 4. Resistance profile of multi-drug resistant clinical bacteria.....                                                                              | 24 |

## **1. General methods**

### **1.1 Recommended media for *Actinomyces* isolation**

M2: 10 g of starch, 0.3 g of casein, 2 g of KNO<sub>3</sub>, 2 g of NaCl, 0.05 g of MgSO<sub>4</sub>·7H<sub>2</sub>O, 2 g of K<sub>2</sub>HPO<sub>4</sub>, 0.02 g of CaCO<sub>3</sub>, 0.01 g of FeSO<sub>4</sub>·7H<sub>2</sub>O, 1 g of glucose, 15 g of agar, 1L distilled water, and pH adjusted at 7.2<sup>1</sup>.

GA: 10 g of Glucose, 0.5 g of asparagine, 0.5 g of K<sub>2</sub>HPO<sub>4</sub>, 15 g of agar, 1L distilled water, and pH adjusted at 6<sup>1</sup>.

GLM: 10 g of glucose, 3 g of yeast extract, 3 g of malate extract, 5 g of tryptone, 15 g of agar, 1L distilled water, and pH adjusted at 7.2<sup>2,3</sup>.

Bennett : 10 g of glucose, 2 g of yeast extract, 1 g of meat extract, 2 g of tryptone, 15 g of agar, 1L distilled water, and pH adjusted at 7.2<sup>4</sup>.

### **1.2 Recommended media for testing antimicrobial activity<sup>5</sup>**

ISP1: 3 g of yeast extract, 5 g of tryptone, 16 g of agar, 1L of distilled water, and pH adjusted at 7.15.

ISP2: 4 g of yeast extract, 4 g of glucose, 10 g of malate extract, 16 g of agar, 1L of distilled water, and pH adjusted at 6.51.

GYEA: 10 g of yeast extract, 10 g of glucose, 16 g of agar, 1L of distilled water, and pH adjusted at 6.96.

Bennett: 10 g of glucose, 2 g of yeast extract, 1 g of meat extract, 2 g of tryptone, 15 g of agar, 1L distilled water, and pH adjusted at 7.2.

### **1.3 Recommended medium for testing NaCl tolerance**

YEA medium: 3 g of yeast extract, 5 g of peptone, 15 g of agar, 1L of distilled water, and pH adjusted at 7.2.

### **1.4 Recommended medium for the production of melanoid pigment**

ISP9: 2.64 g of  $(\text{NH}_2) \text{SO}_4$ , 2.38 g of  $\text{KH}_2\text{PO}_4$ , 5.65 g of  $\text{K}_2\text{HPO}_4$ , 1 g of  $\text{MgSO}_4, 7\text{H}_2\text{O}$ , 20 g of agar, and 1L of distilled water.

100 mL salt solution: 4 g of  $\text{CuSO}_4, 5\text{H}_2\text{O}$ , 1.1 g of  $\text{FeSO}_4, 7\text{H}_2\text{O}$ , 7.9 g of  $\text{MnCl}_2, 4\text{H}_2\text{O}$ , 1.5 g of  $\text{ZnSO}_4, 7\text{H}_2\text{O}$ .

### **1.5 Other media used in this study**

PDA medium: 4 g of potato extract 20 g of glucose, 15 g of agar, 1L distilled water, and pH adjusted at 7.5.

Muller Hinton Agar medium: Ready to use

CLED medium: Ready to use.

## 2. Supplementary figures

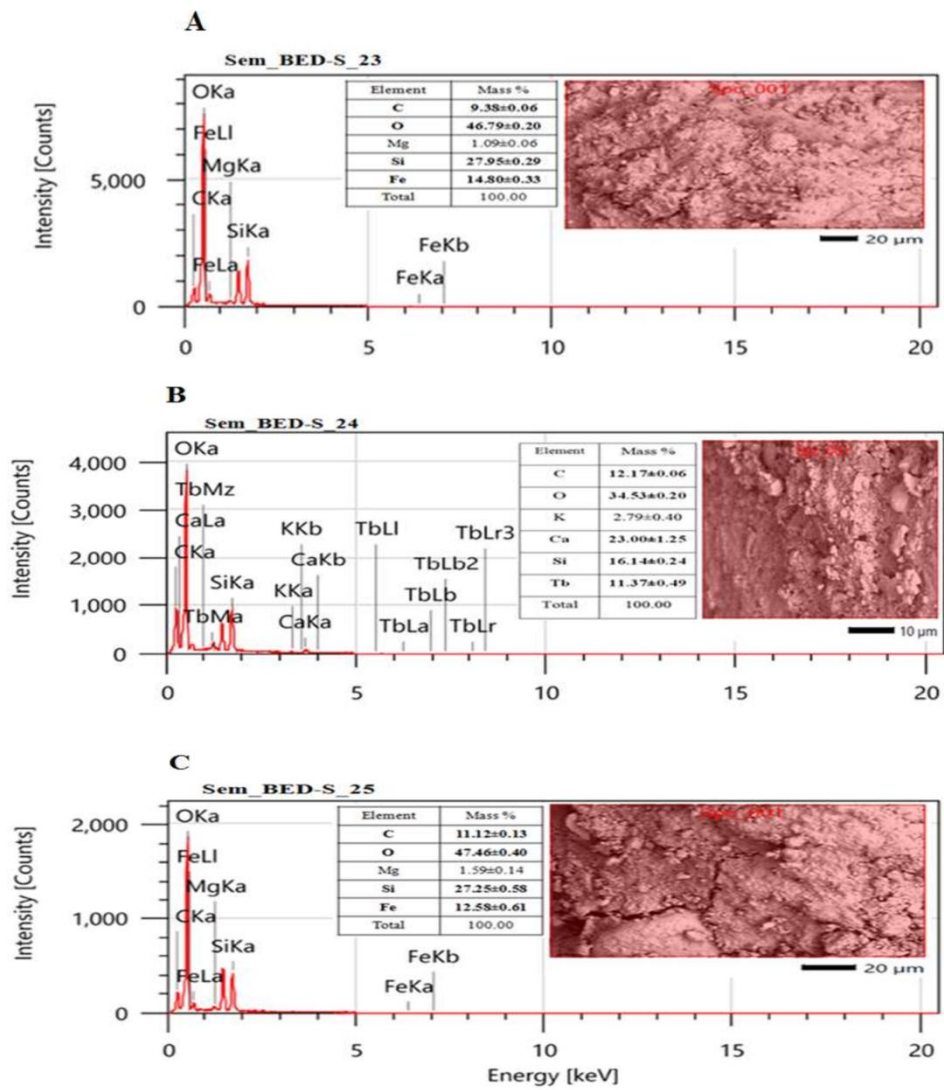

Figure S1. Analysis of minerals using scanning electron microscope (SEM).

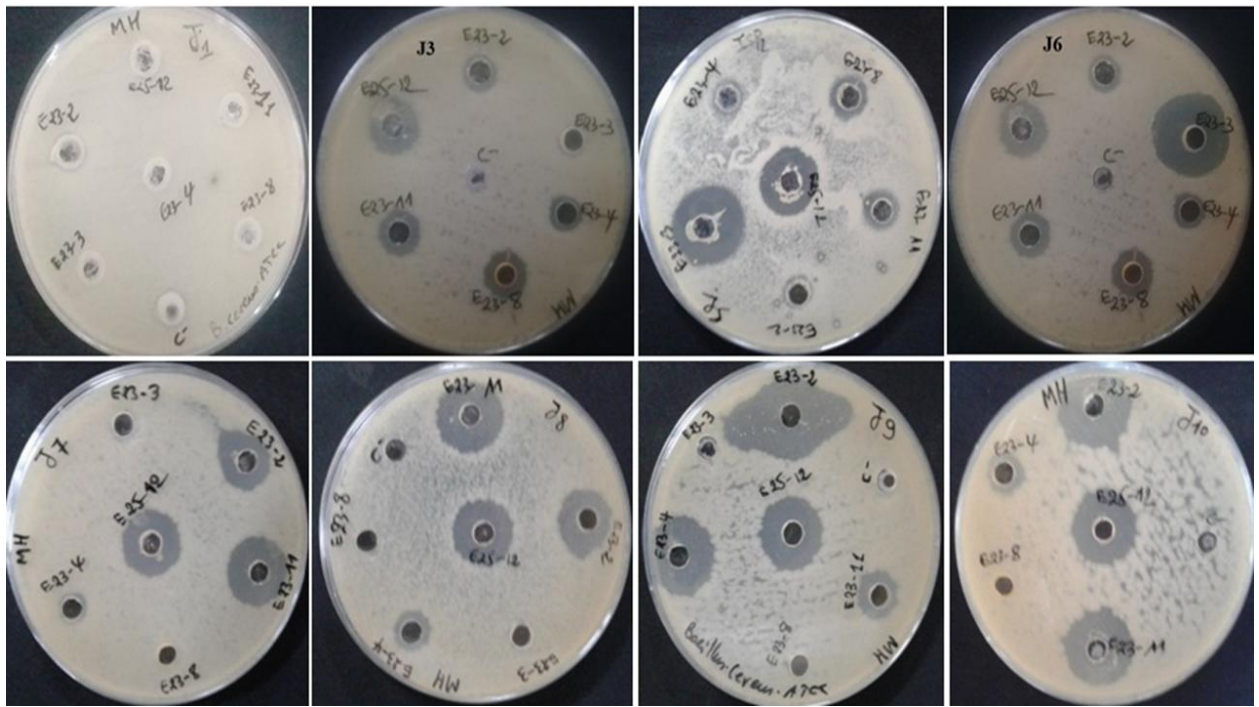

Figure S2. Production kinetics of antibiotics against *Bacillus cereus* ATCC 14579.

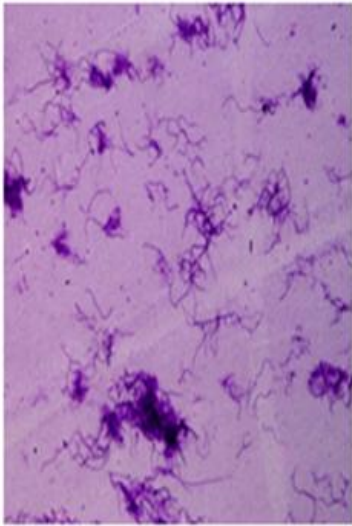

*Streptomyces sp* strain  
E23-2 (OM883988)  
(x20)

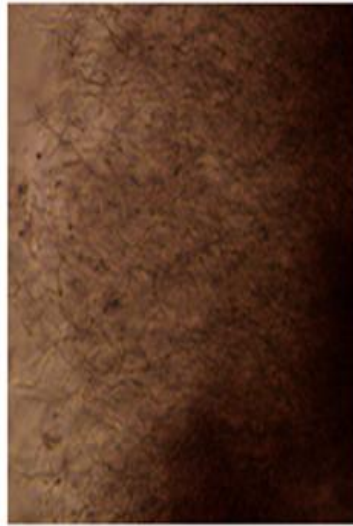

*Streptomyces sp* strain  
E23-11(OM883994)  
(X20)

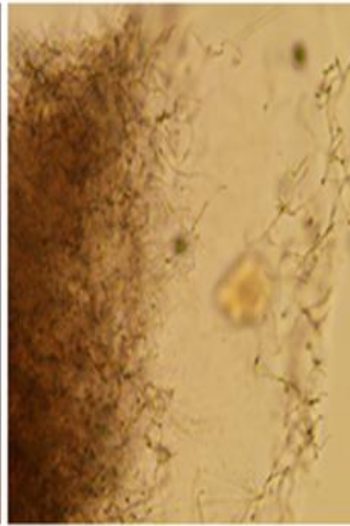

*Streptomyces sp* strain  
E25-11 (OM883997)  
(X20)

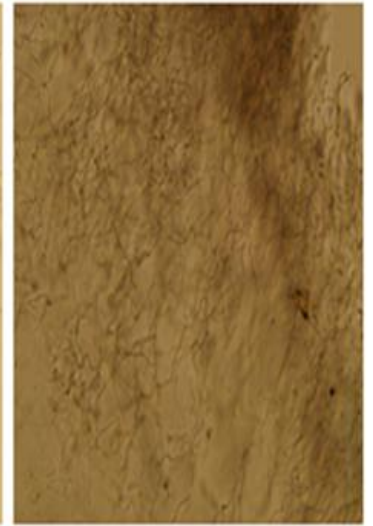

*Streptomyces bellus* strain  
E25-12 (OM883998)  
(X20)

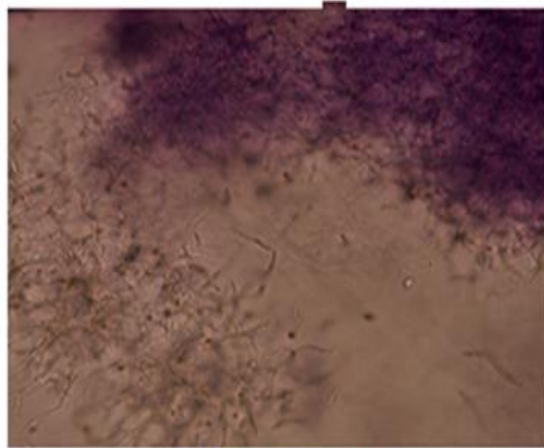

*Streptomyces sp* Strain  
E23-4 (OM883990)  
(X20)

**Figure S3. Microscopic aspect of the most active *Streptomyces* (Gram staining).**



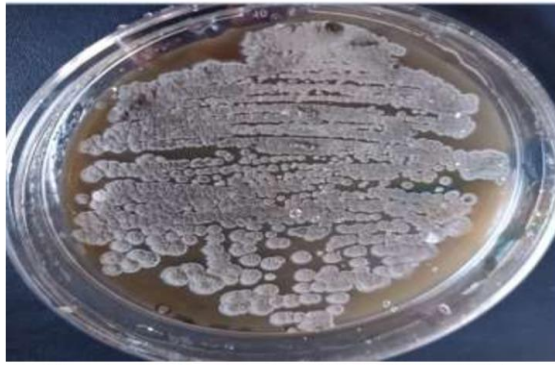

*Streptomyces* sp. strain E25-11 OM883997

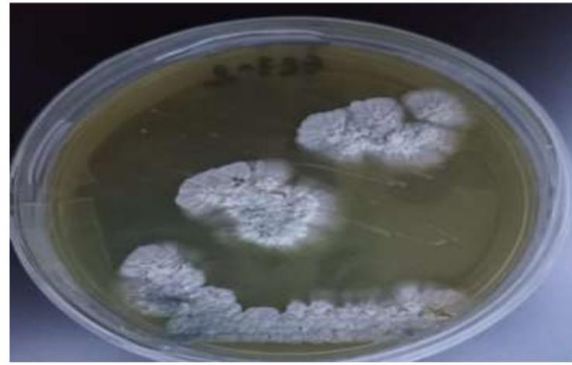

*Streptomyces* sp. strain E23-2 OM883988

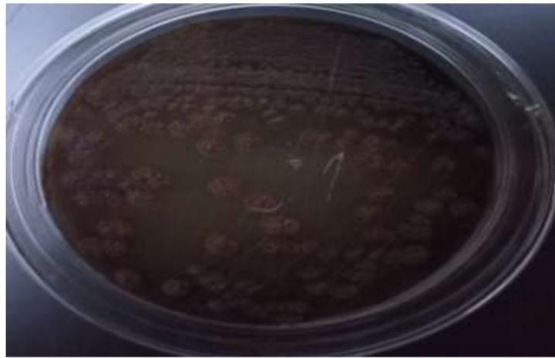

*Streptomyces* sp. strain E23-4 OM883990

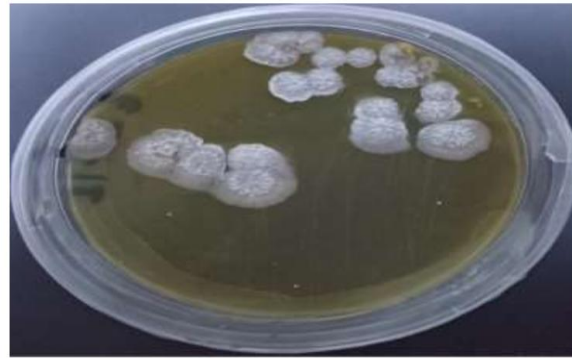

*Streptomyces bellus* strain E25-12 OM883998

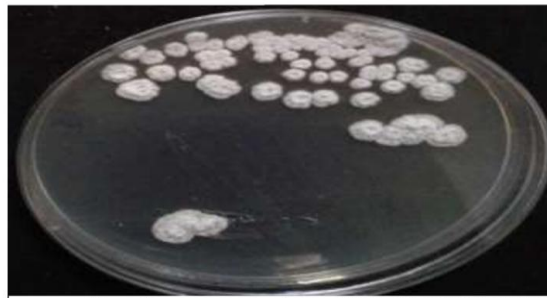

*Streptomyces* sp. strain E23-11 OM883994

**Figure S4.** Morphological aspect of the colonies of five isolates of active *Streptomyces*



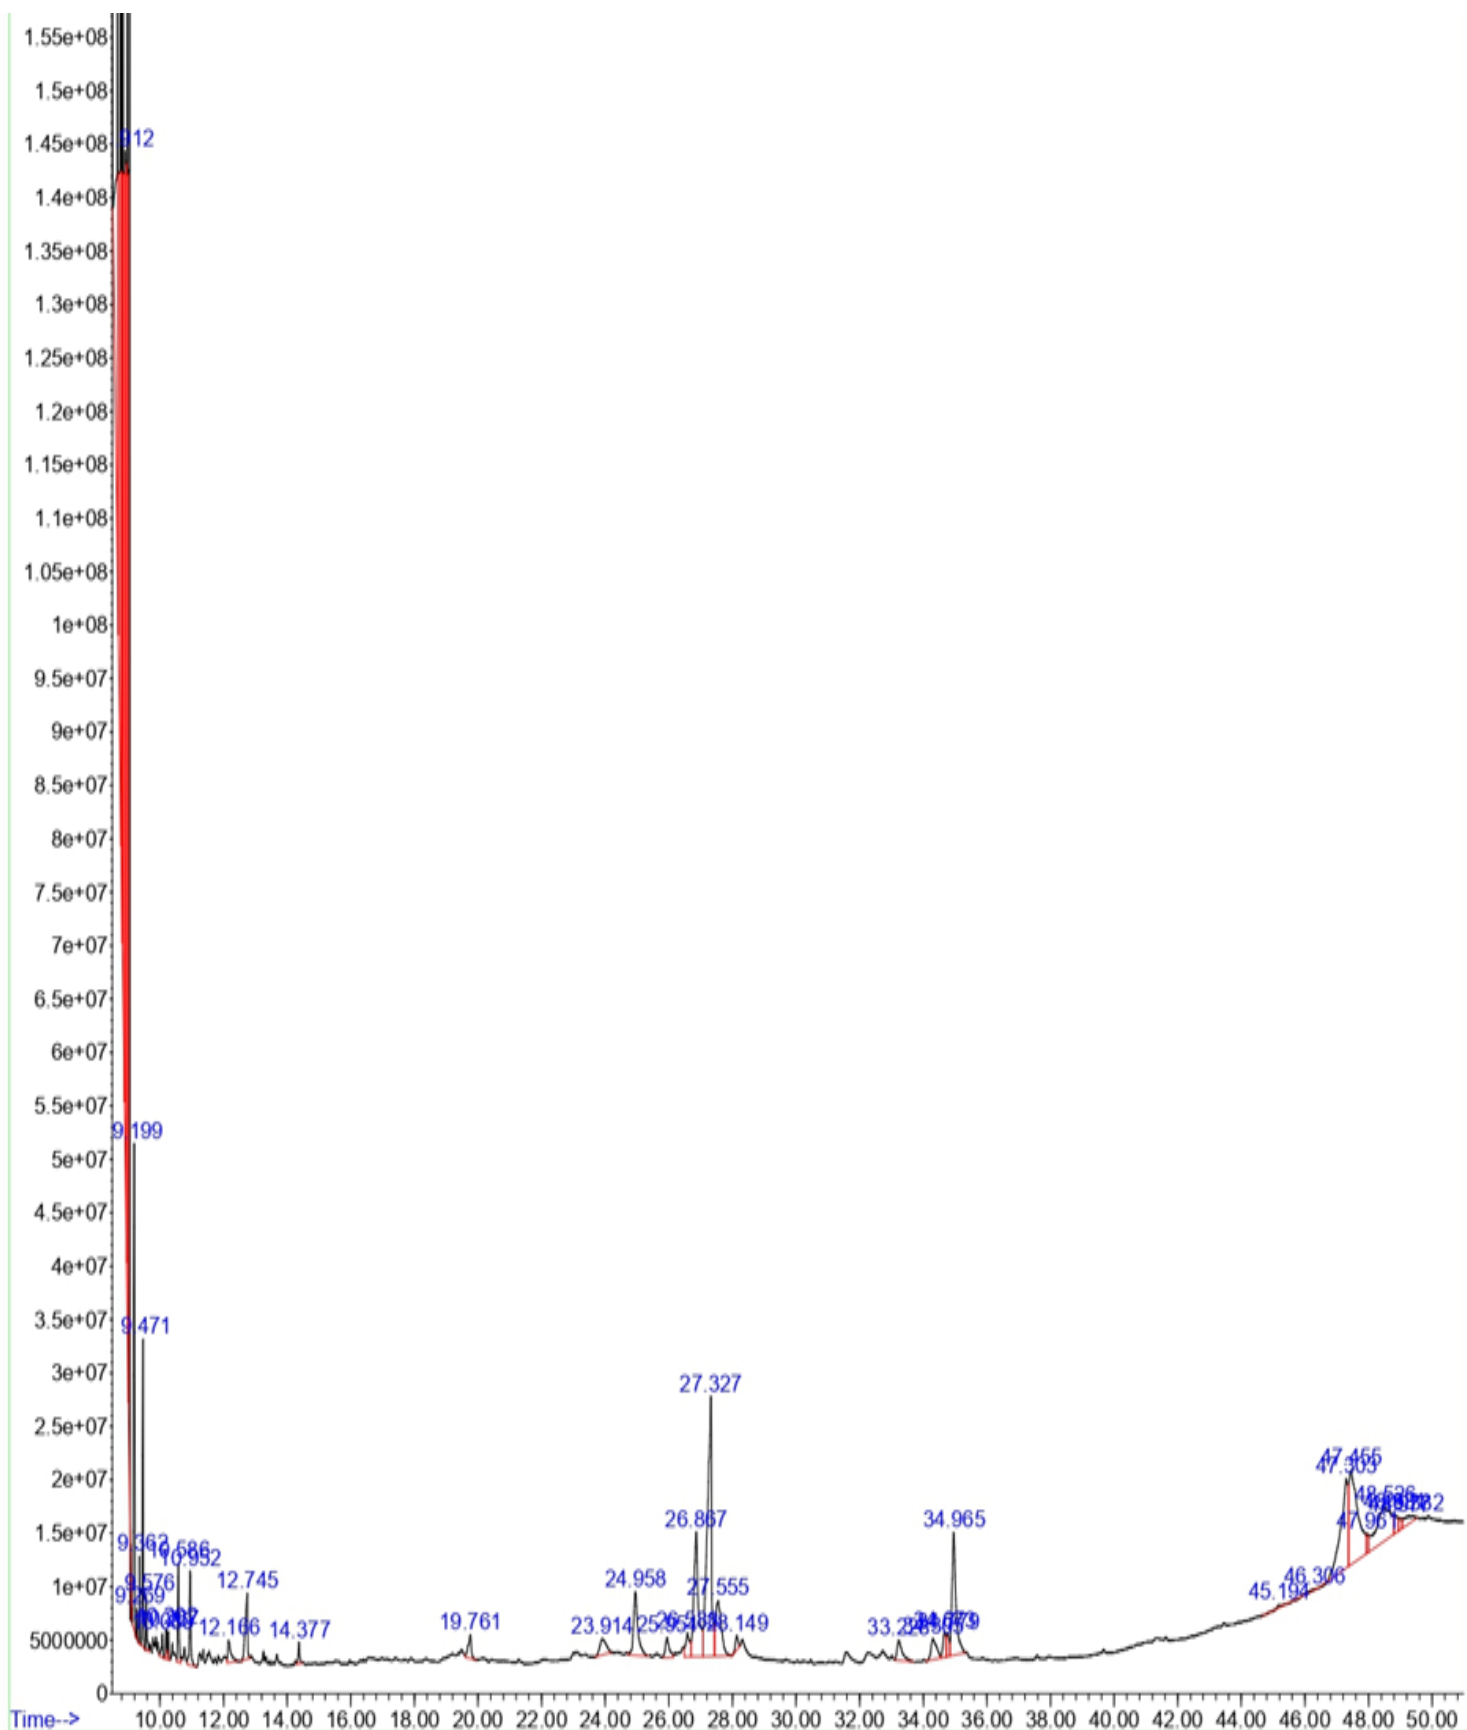

**Figure S5. GC-MS of dichloromethane crude extract of E23-4 OM883990 strain with peaks indicating the presence of bioactive compounds (according to the NIST database).**

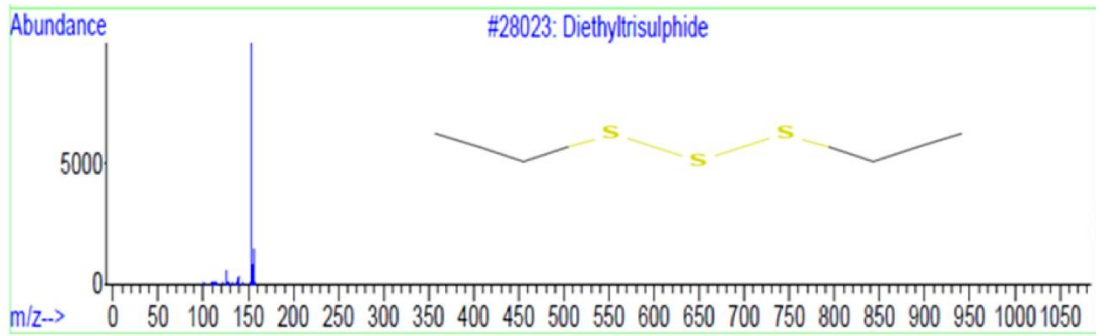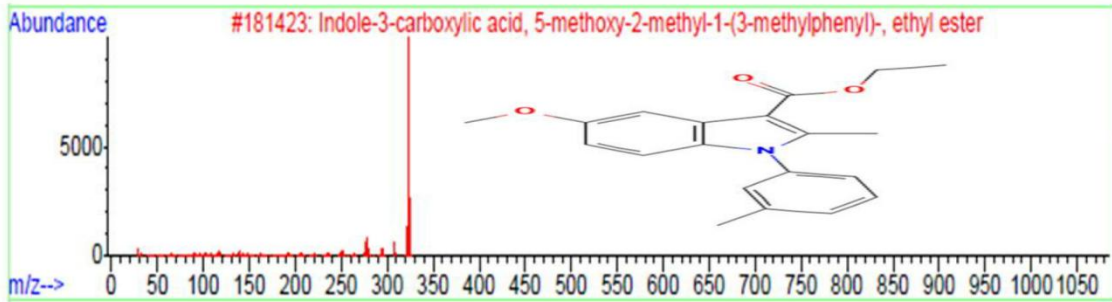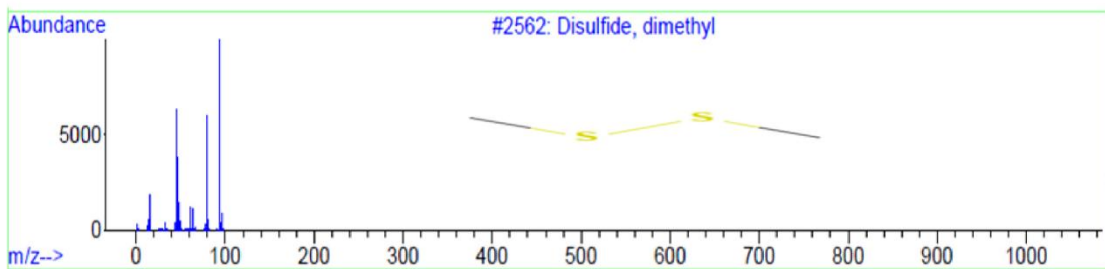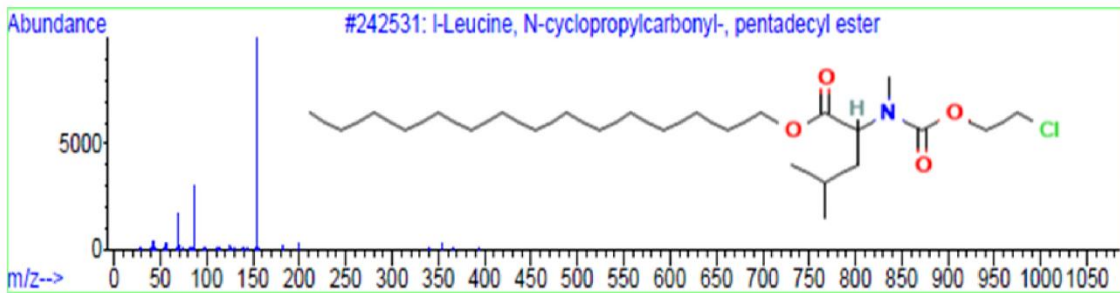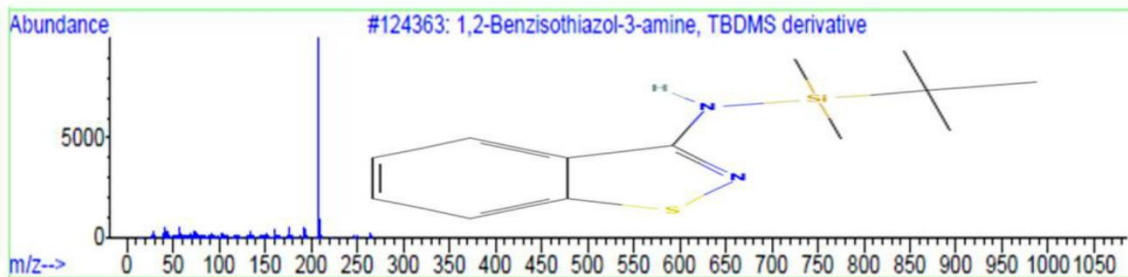

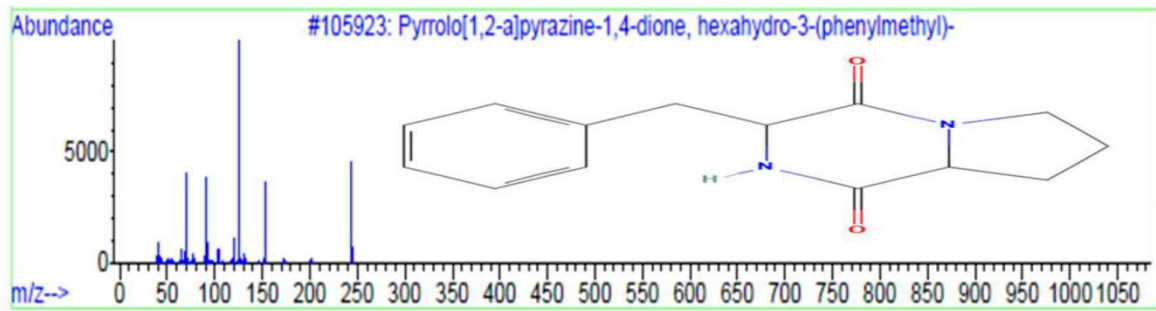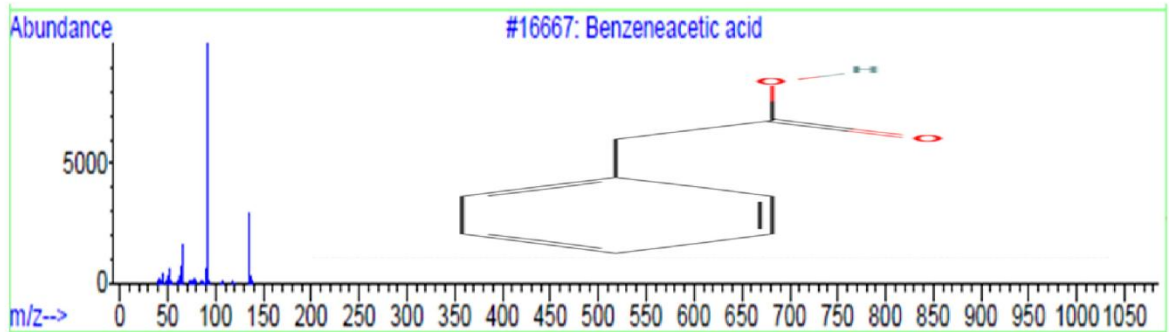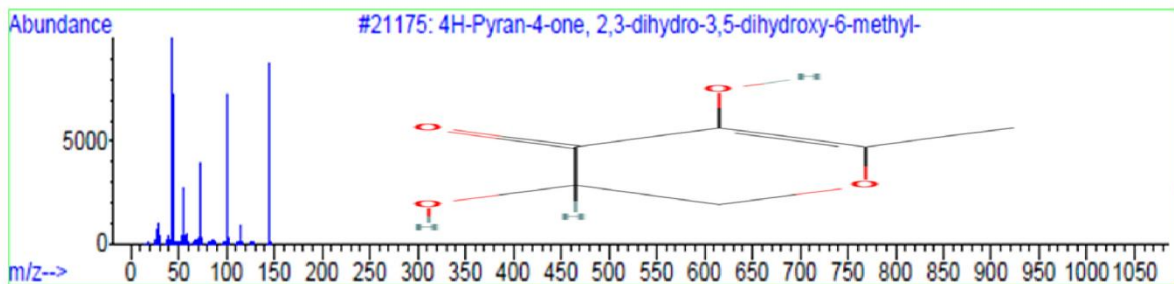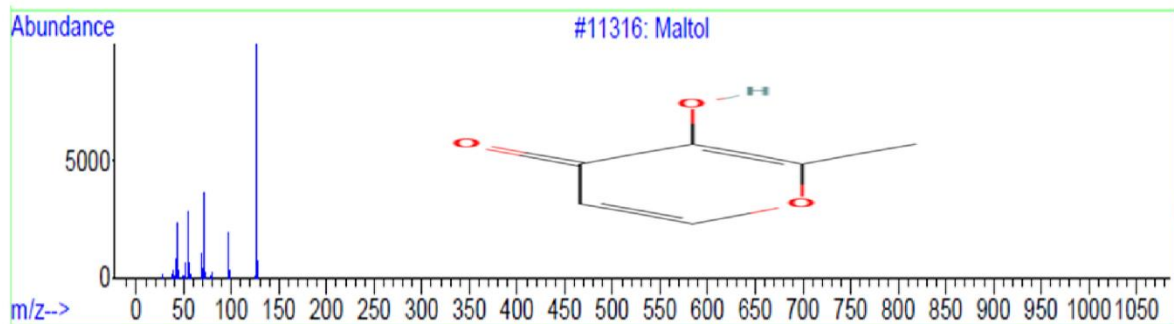

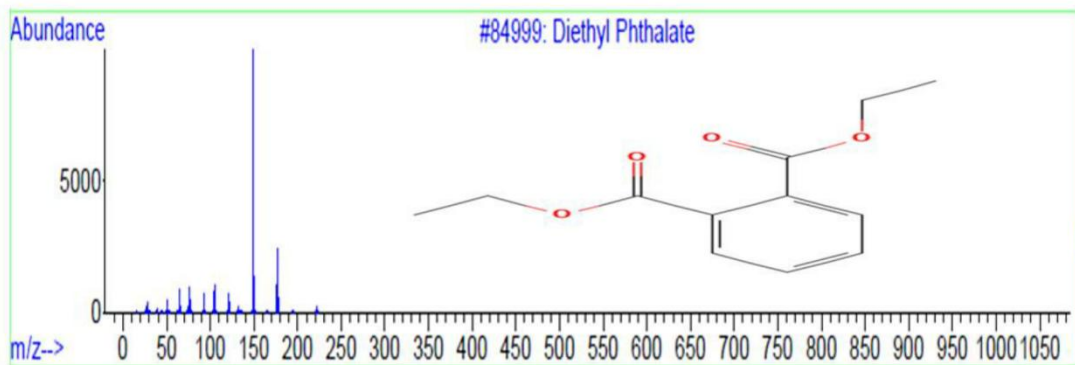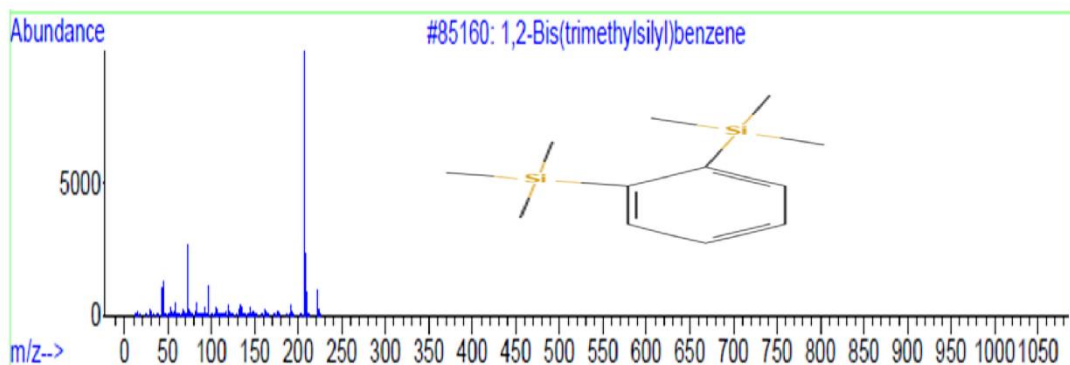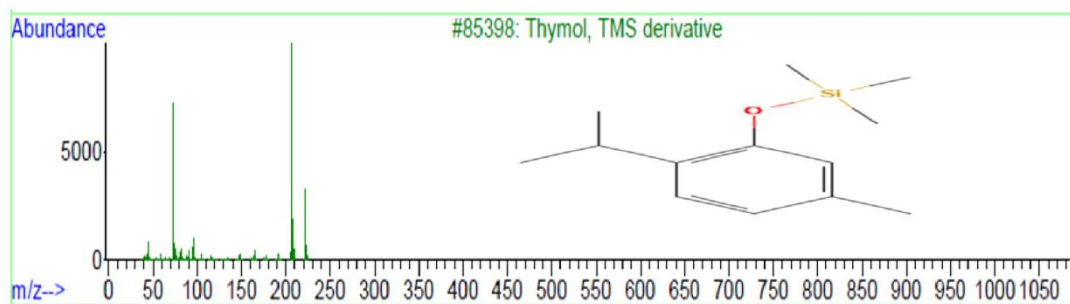

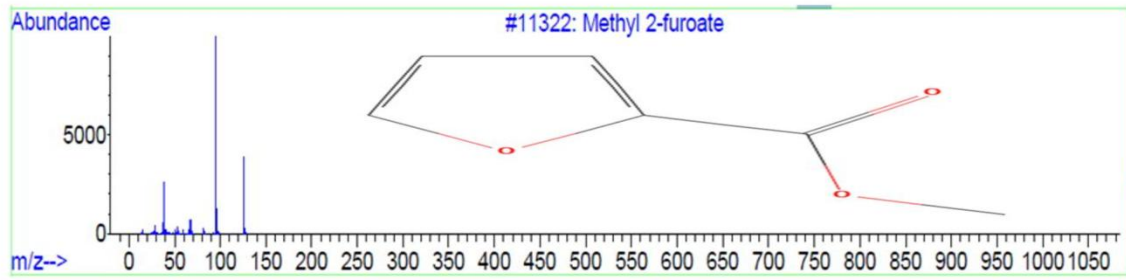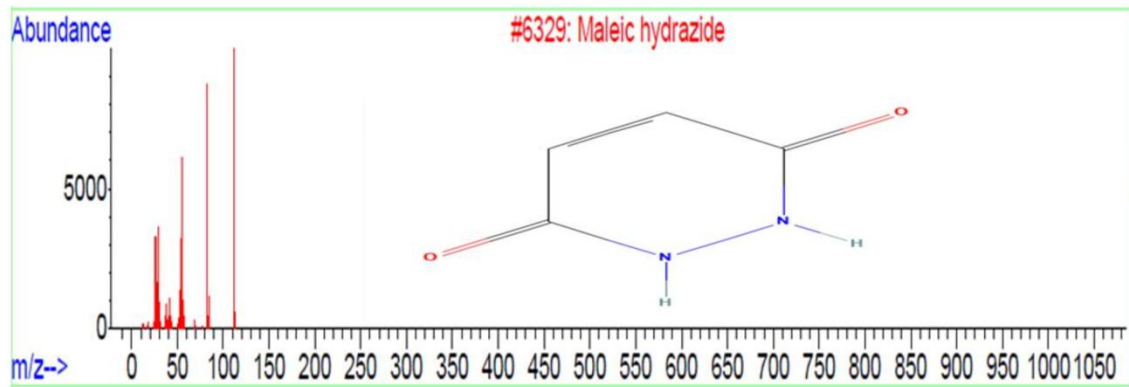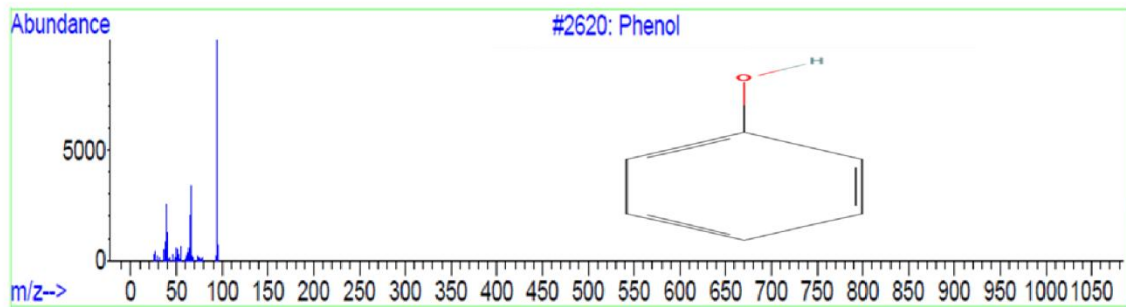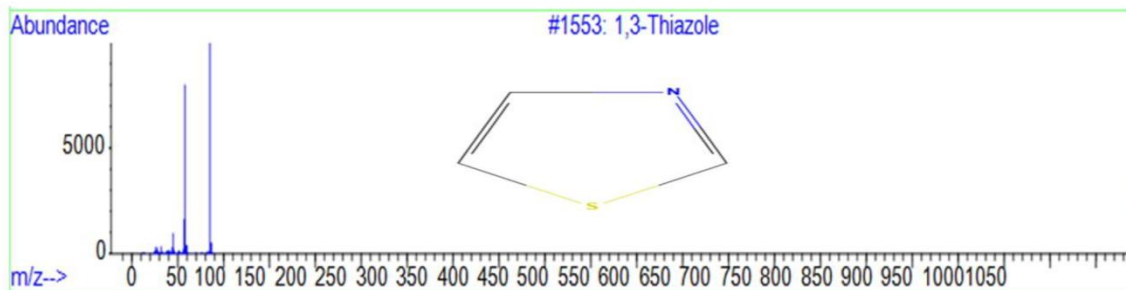

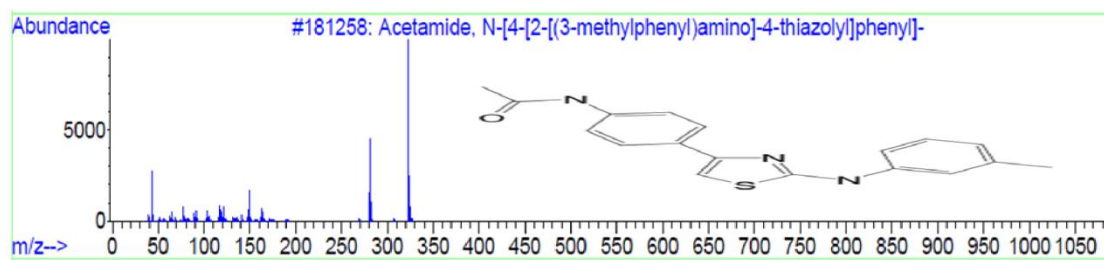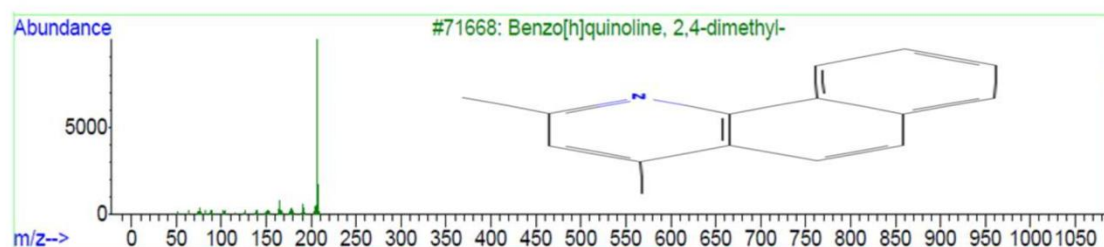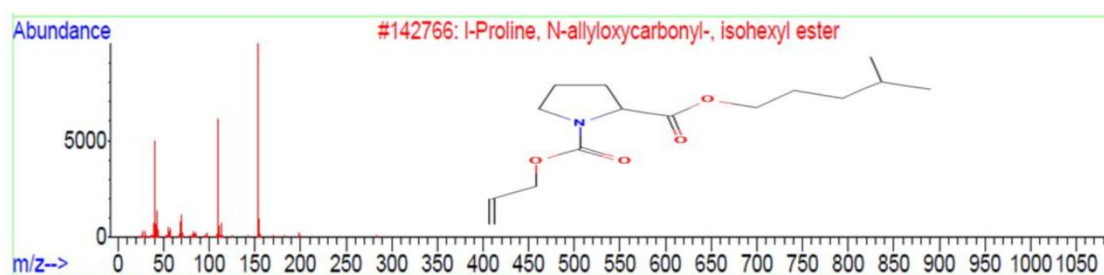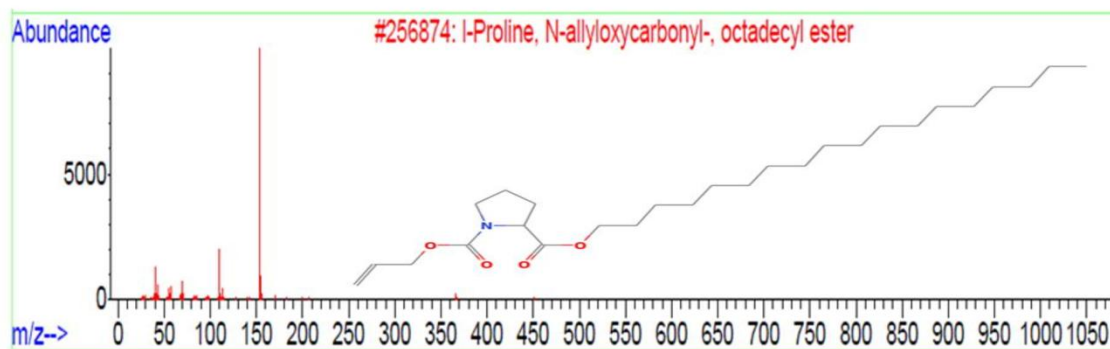

**Figure S6. Chemical structures of 21 secondary metabolites present in dichloromethane extract of E23-4 OM883990 strain analyzed by GC-MS.**



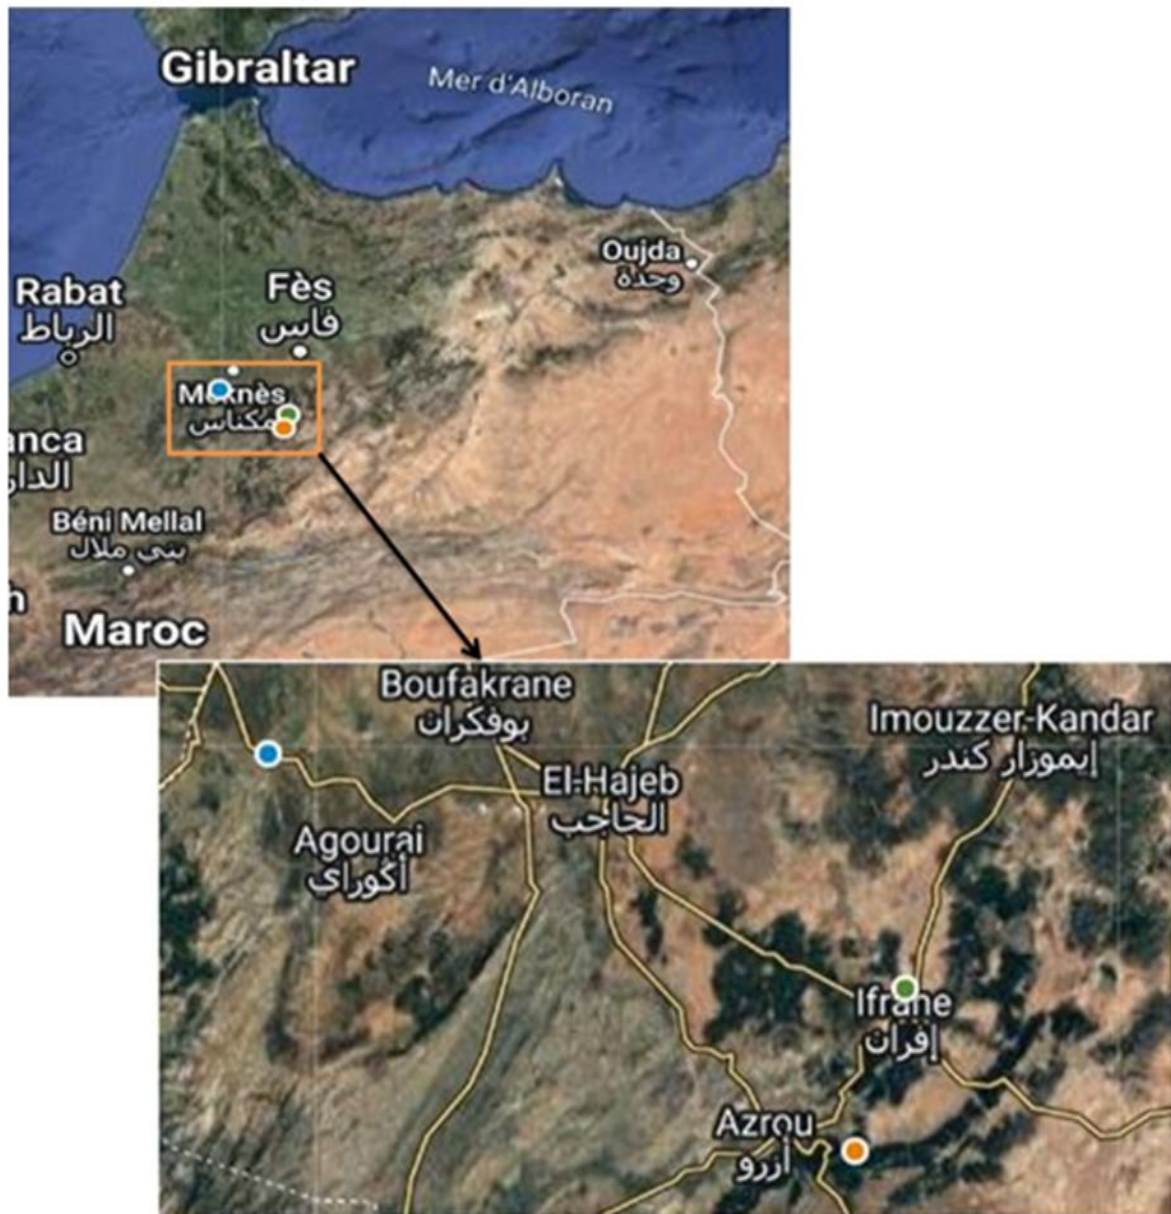

**Figure S7.** A map of the sampling sites retrieved from Google Maps (Google Maps. Map Data ©2022. Retrieved from <https://www.google.com/maps/@32.9937363,-7.6005892,15z>).



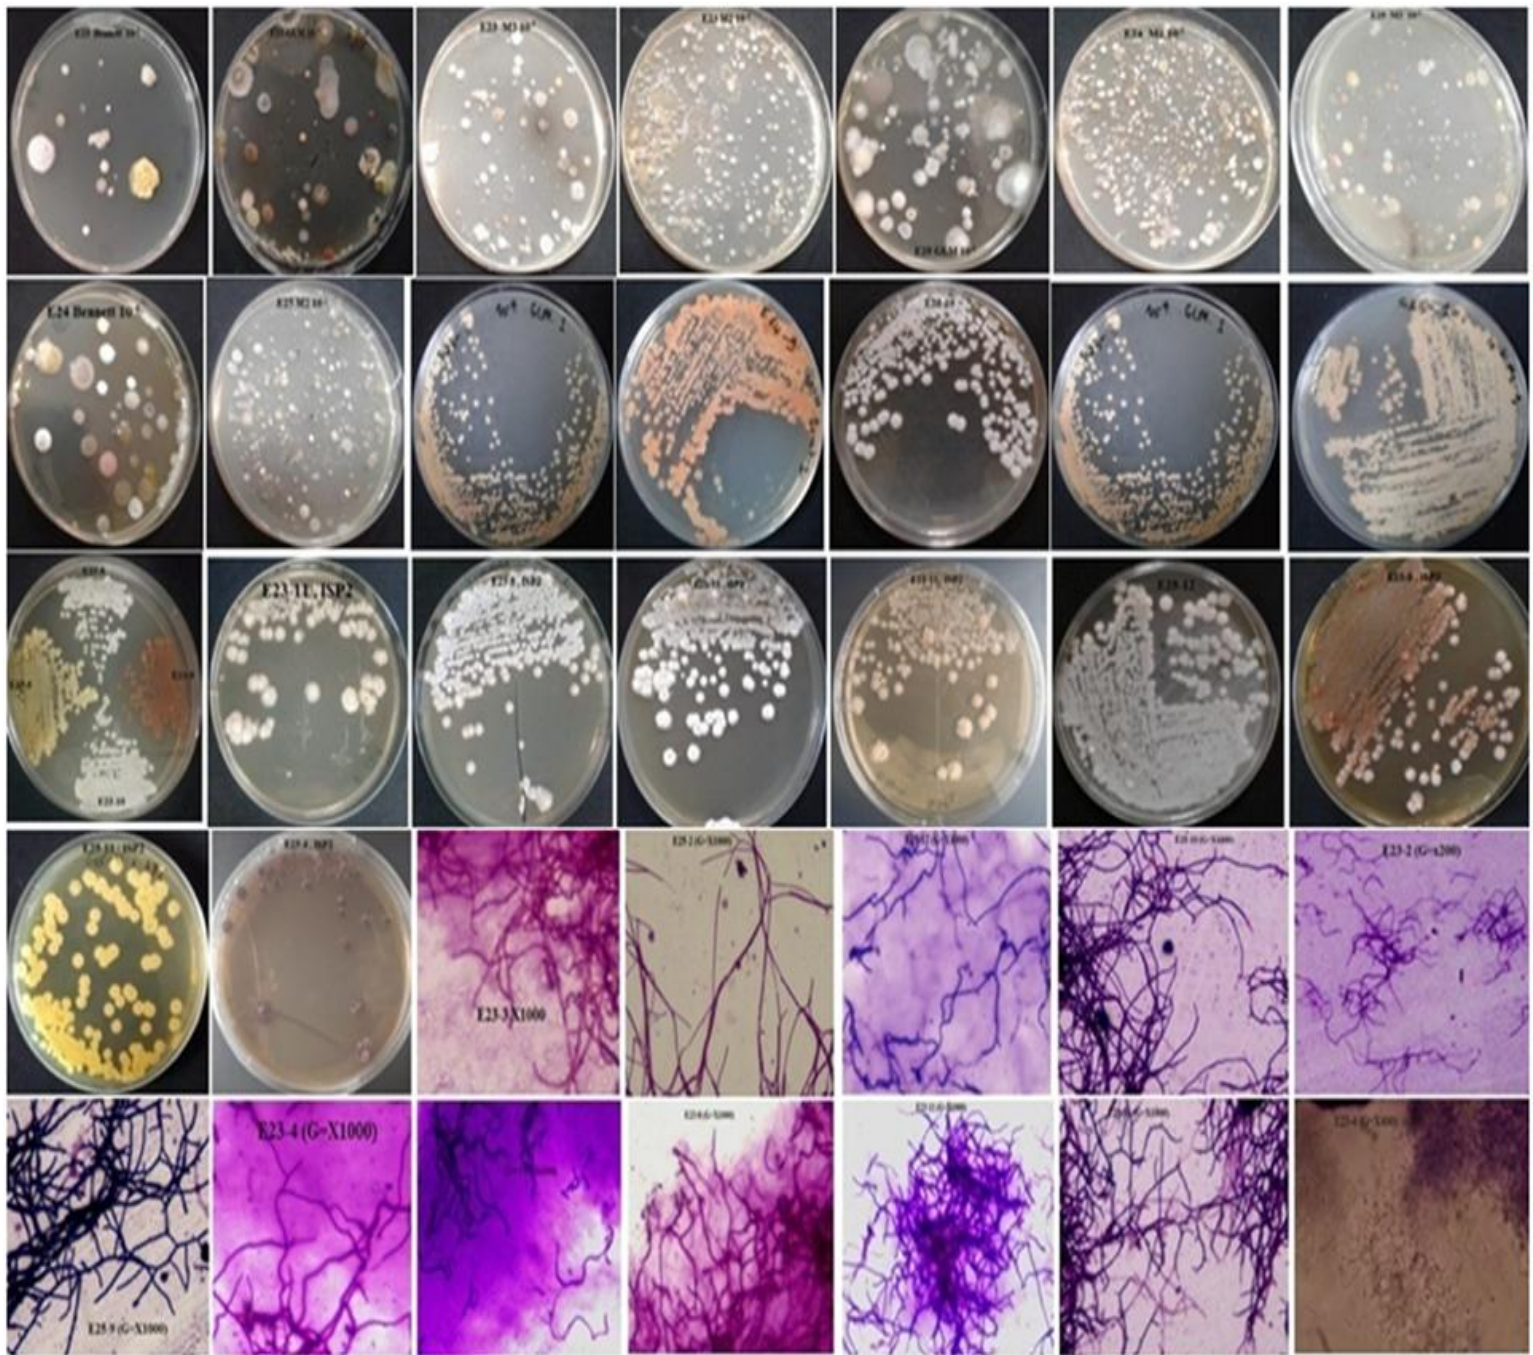

**Figure S8. *Actinomycetes* isolates obtained in the three studied (A, B and C) according to the culture media used.**

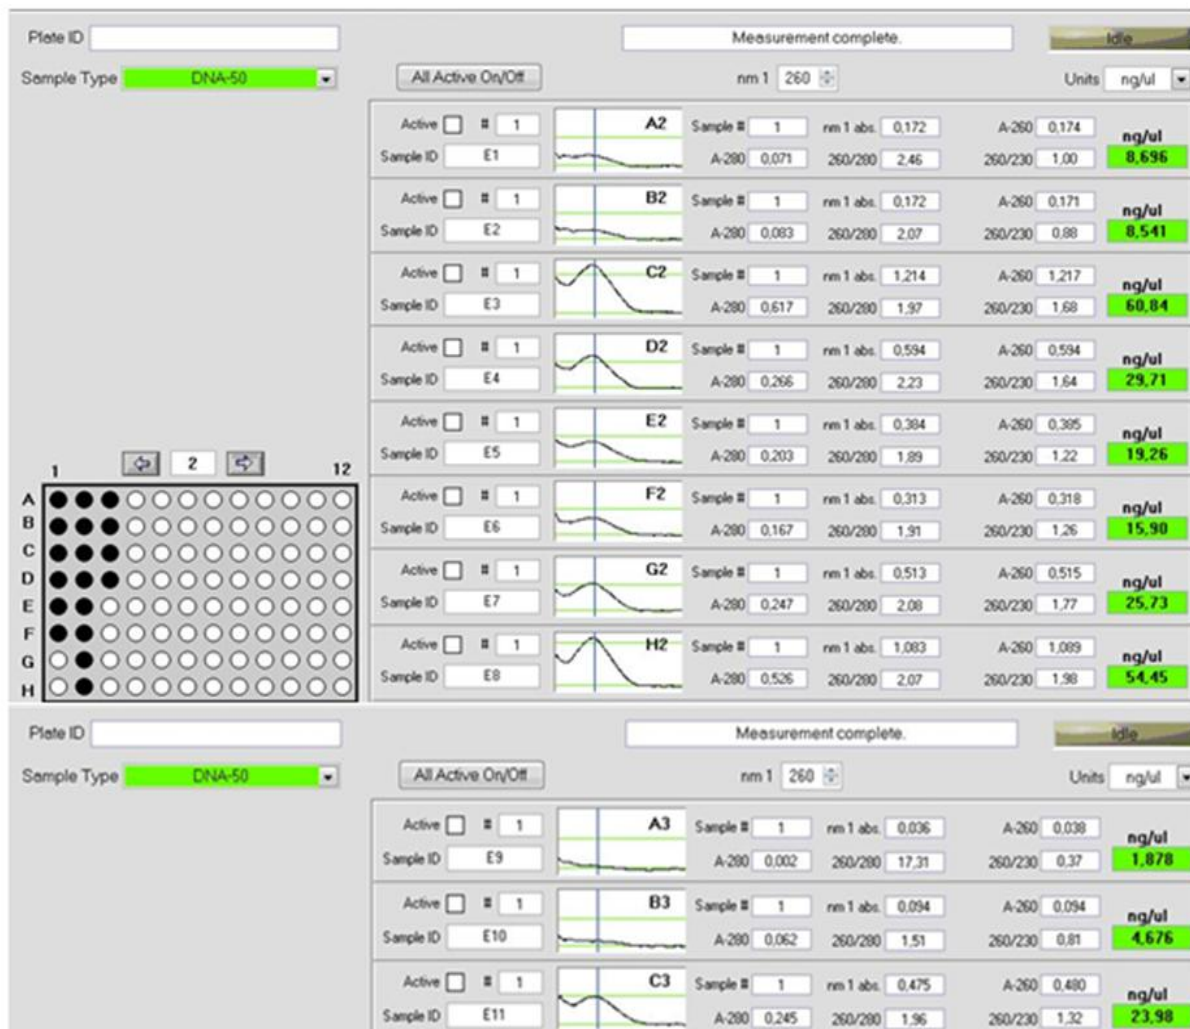

**Figure S9. Determination of the extracted DNA by Nanodrop 8000.**

The concentrations of the 11 samples are showed in the figure below.

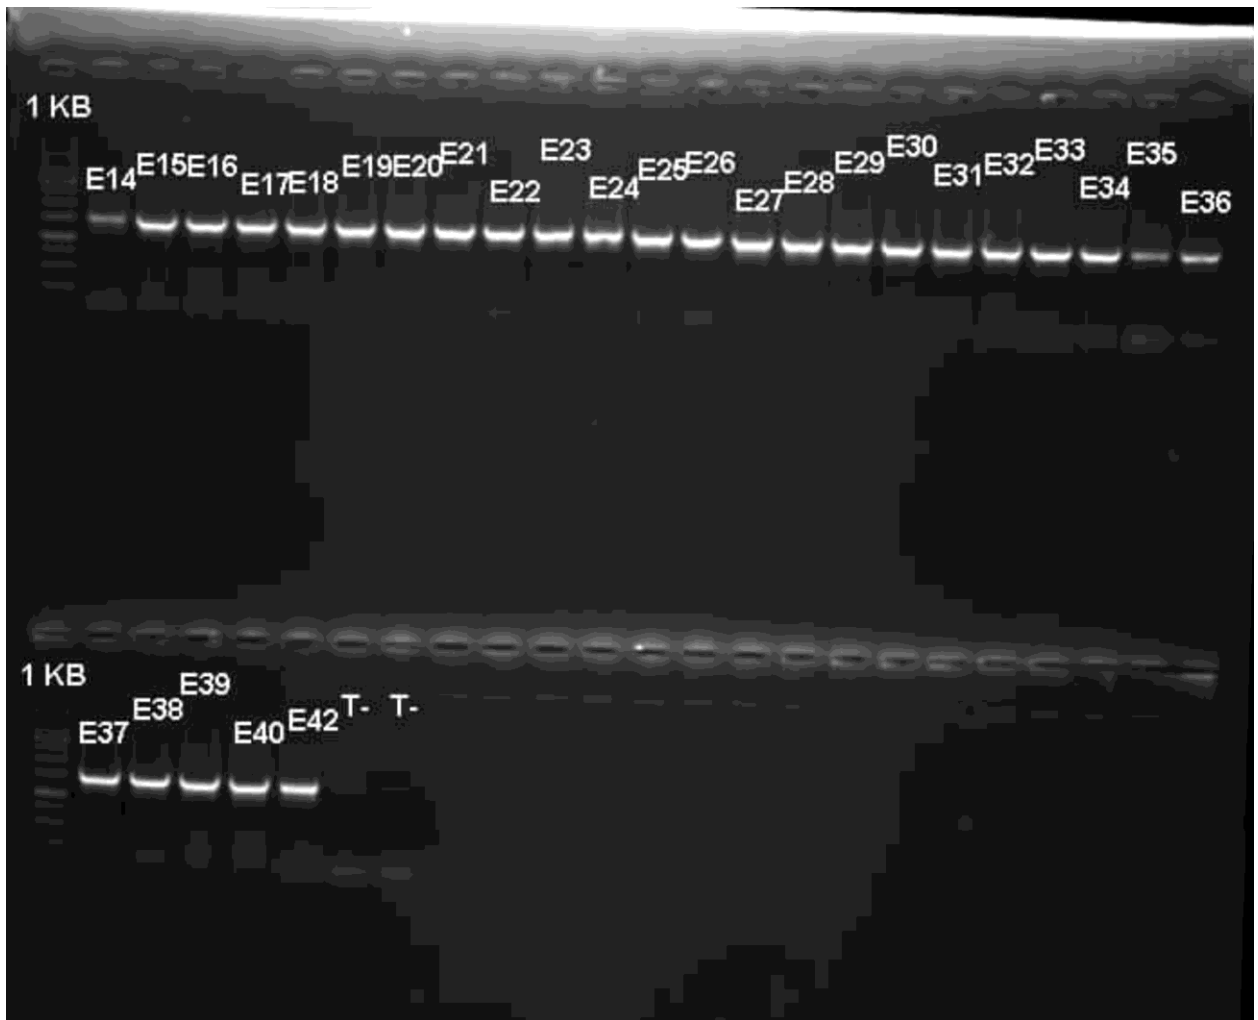

**Figure S10. Agarose gel electrophoresis for amplification of genes coding for 16S rRNA of *Actinomyces* strains.**

Bands were fractionated by electrophoresis on a agarose gel (1 %) and visualised by the photo documentation system " G Box ".

### 3. Supplementary tables

**Supplementary Table 1: Morphological characteristics of active *Streptomyces* isolates.**

| Strains | Identification<br>(Scientific Name)   | NCBI GenBank<br>accession<br>number | Colony<br>aspect    | Surface<br>(aerial<br>mycelium) | Reverse<br>(substrate<br>mycelium) | Pigmentati<br>on of the<br>medium | Gram staining              |
|---------|---------------------------------------|-------------------------------------|---------------------|---------------------------------|------------------------------------|-----------------------------------|----------------------------|
| E23-2   | <i>Streptomyces</i> sp.               | OM883988                            | Circular            | Whitish, not<br>powdery         | yellowish,<br>Orange               | Absent                            | Gram-positive<br>filaments |
| E23-3   | <i>Streptomyces<br/>africans</i>      | OM883989                            | Starry              | Whitish, not<br>powdery         | yellowish                          | Absent                            | Gram-positive<br>filaments |
| E23-4   | <i>Streptomyces</i> sp.               | OM883990                            | Circular            | Brick                           | Brick                              | Brownish                          | Gram-positive<br>filaments |
| E23-8   | <i>Streptomyces</i> sp.               | OM883991                            | Circular            | Whitish, not<br>powdery         | yellowish,<br>pale                 | Absent                            | Gram-positive<br>filaments |
| E23-9   | <i>Streptomyces<br/>galilaeus</i>     | OM883992                            | Circular,<br>Starry | Orange                          | Orange                             | Absent                            | Gram-positive<br>filaments |
| E23-10  | <i>Streptomyces<br/>bellus</i>        | OM883993                            | Punctiform          | Whitish, not<br>powdery         | yellowish,<br>Orange               | Absent                            | Gram-positive<br>filaments |
| E23-11  | <i>Streptomyces</i> sp.               | OM883994                            | Circular,<br>Starry | Beige                           | yellowish,<br>pale                 | Absent                            | Gram-positive<br>filaments |
| E24-9   | <i>Streptomyces<br/>amritsarensis</i> | OM883995                            | Circular            | Pinkish                         | Orange                             | Absent                            | Gram-positive<br>filaments |
| E25-9   | <i>Streptomyces</i> sp.               | OM883996                            | Starry              | Beige                           | yellowish,<br>Orange               | Absent                            | Gram-positive<br>filaments |
| E25-11  | <i>Streptomyces</i> sp.               | OM883997                            | Starry              | Beige                           | yellowish,<br>Orange               | Absent                            | Gram-positive<br>filaments |
| E25-12  | <i>Streptomyces<br/>bellus</i>        | OM883998                            | Punctiform          | Whitish,<br>powdery             | yellowish,<br>Orange               | Absent                            | Gram-positive<br>filaments |



**Supplementary Table 2: Molecular identification of the 11 selected *Actinomyces* isolates based on 16S rRNA gene sequencing.**

| Isolate Name | Query Length (bp) | Nearest known species <sup>a</sup>                                                                                                                                                                     | Max Score | Query Coverage (%) | E-value | Percent identity (%) | Identification <sup>b</sup> (Scientific Name) | NCBI GenBank accession number(s) |
|--------------|-------------------|--------------------------------------------------------------------------------------------------------------------------------------------------------------------------------------------------------|-----------|--------------------|---------|----------------------|-----------------------------------------------|----------------------------------|
| E23-2        | 1393              | <i>Streptomyces bellus</i> NBRC 12844(T) (NR_041222.1) / <i>Streptomyces coeruleus</i> CSSP046(T) ( NR_043337.1)                                                                                       | 2477      | 100                | 0.0     | 98.92                | <i>Streptomyces</i> sp.                       | OM883988                         |
| E23-3        | 1388              | <i>Streptomyces africanus</i> NBRC 101005 (T) (NR_112600.1)                                                                                                                                            | 2490      | 100                | 0.0     | 99.06                | <i>Streptomyces africanus</i>                 | OM883989                         |
| E23-4        | 1399              | <i>Streptomyces novaecaesareae</i> NBRC 13368 (T) (NR_041124.1)/ <i>Streptomyces resistomycificus</i> NBRC 12814 (T) (NR_112287.1) / <i>Streptomyces pseudovenezuelae</i> NBRC 12904 (T) (NR_041090.1) | 2473      | 100                | 0.0     | 98.65                | <i>Streptomyces</i> sp.                       | OM883990                         |
| E23-8        | 1402              | <i>Streptomyces coeruleofuscus</i> CSSP429 (T) (NR_115381.1) / <i>Streptomyces bellus</i> NBRC 12844 (T) (NR_041222.1)                                                                                 | 2431      | 100                | 0.0     | 98.15                | <i>Streptomyces</i> sp.                       | OM883991                         |
| E23-9        | 1395              | <i>Streptomyces galilaeus</i> NBRC 13400 (T) ( NR_112389.1)/ <i>Streptomyces galilaeus</i> JCM 4757 (T) (NR_040857.1)                                                                                  | 2516      | 100                | 0.0     | 99.28                | <i>Streptomyces galilaeus</i>                 | OM883992                         |
| E23-10       | 1231              | <i>Streptomyces bellus</i> NBRC 12844(T) (NR_041222.1)                                                                                                                                                 | 2246      | 100                | 0.0     | 99.59                | <i>Streptomyces bellus</i>                    | OM883993                         |
| E23-11       | 1508              | <i>Streptomyces bellus</i> NBRC 12844 (T) (NR_041222.1)/ <i>Streptomyces coeruleofuscus</i> CSSP429 (T) (NR_115381.1)                                                                                  | 2425      | 94                 | 0.0     | 97.56                | <i>Streptomyces</i> sp.                       | OM883994                         |

|        |      |                                                                                                                             |      |     |     |       |                                   |          |
|--------|------|-----------------------------------------------------------------------------------------------------------------------------|------|-----|-----|-------|-----------------------------------|----------|
| E24-9  | 1373 | <i>Streptomyces amritsarensis</i> 2A (T) (NR_126204.1)                                                                      | 2497 | 99  | 0.0 | 99.63 | <i>Streptomyces amritsarensis</i> | OM883995 |
| E25-9  | 1416 | <i>Streptomyces afghaniensis</i> NBRC 12831 (T) (NR_041221.1) / <i>Streptomyces africanus</i> NBRC 101005 (T) (NR_112600.1) | 2377 | 100 | 0.0 | 97.25 | <i>Streptomyces</i> sp.           | OM883996 |
| E25-11 | 1576 | <i>Streptomyces avermitilis</i> (T) (NR_074747.2) / <i>Streptomyces avermitilis</i> NBRC 14893 (T) (NR_112447.1)            | 2006 | 94  | 0.0 | 91.61 | <i>Streptomyces</i> sp.           | OM883997 |
| E25-12 | 1394 | <i>Streptomyces bellus</i> NBRC 12844 (T) (NR_041222.1)                                                                     | 2545 | 100 | 0.0 | 99.64 | <i>Streptomyces bellus</i>        | OM883998 |

---

<sup>a</sup>NCBI's nucleotide BLAST program was used to find the closest match against the non-redundant reference RNA sequence database (refseqrna). The strain number, strain type (T), and GenBank accession number are all listed after the species name.

<sup>b</sup>Isolates with a greater percentage of identity than 98.7% <sup>6</sup> and only one closest match for the same identity characteristics are classified up to the species level.

To assess the reliability of a phylogenetic tree, MEGA provides the Bootstrap test. This test uses the bootstrap re-sampling strategy, so you need to enter the number of replicates. For a given data set, applicable tests and the phylogeny inference method are enabled. Neighbor joining has an additional test (Interior Branch), which requires the same input as bootstrap

**Supplementary Table 3: Spearman correlation between soil physico-chemical parameters and total number of *Streptomyces* (TNS) in the three stations A, B and C.**

|           | <b>Variables</b>               | <b>Value-r (Spearman)</b> | <b>Significance P-value</b> |
|-----------|--------------------------------|---------------------------|-----------------------------|
| <b>1</b>  | TNS VS Electrical conductivity | -0,800                    | Not significant             |
| <b>2</b>  | TNS VS pH                      | -0.200                    | Not significant             |
| <b>3</b>  | TNS VS Organic carbon          | 0.500                     | Not significant             |
| <b>4</b>  | TNS VS Organic matter          | 1.000**                   | P≤0.01                      |
| <b>5</b>  | TNS VS Total nitrogen          | 1.000**                   | P≤0.01                      |
| <b>6</b>  | TNS VS Clay texture            | 0.211                     | Not significant             |
| <b>7</b>  | TNS VS Sandy texture           | 0.500                     | Not significant             |
| <b>8</b>  | TNS VS Silty texture           | 0.400                     | Not significant             |
| <b>9</b>  | TNS VS Magnesium               | 0.400                     | Not significant             |
| <b>10</b> | TNS VS Aluminum                | 0.500                     | Not significant             |
| <b>11</b> | TNS VS Silicon                 | -0.500                    | Not significant             |
| <b>12</b> | TNS VS Potassium               | -0.500                    | Not significant             |
| <b>13</b> | TNS VS Calcium                 | -0.400                    | Not significant             |
| <b>14</b> | TNS VS Oxygen                  | 0.400                     | Not significant             |
| <b>15</b> | TNS VS Sulfur                  | -1.000**                  | P≤0.01                      |
| <b>16</b> | TNS VS Chlorine                | -1.000**                  | P≤0.01                      |
| <b>17</b> | TNS VS Phosphorus              | 0.400                     | Not significant             |
| <b>18</b> | TNS VS Iron                    | -0.500                    | Not significant             |
| <b>19</b> | TNS VS Manganese               | 0.400                     | Not significant             |
| <b>20</b> | TNS VS Cu                      | -0.500                    | Not significant             |
| <b>21</b> | TNS VS Zn                      | 0.800                     | Significant                 |

(\*\*): The correlation is significant at the 0.01 level, (TNS): Total number of *Streptomyces*



**Supplementary Table 4: Resistance profile of multi-drug resistant (MDR) clinical bacteria.**

| Test strains                                         | Resistance to                                         | Sensitivity to                      | Intermediate to |
|------------------------------------------------------|-------------------------------------------------------|-------------------------------------|-----------------|
| <b>Clinical <i>Escherichia coli</i> 16D1150</b>      | AML, AMC, CXM, CTX, AMP, P, FD, SXT, CIP, OFX, VA     | CRO                                 | CN, F           |
| <b>Clinical <i>Proteus vulgaris</i> 16C1737</b>      | F, AMC, AML, CXM, CTX, SXT, AMP, P, FD                | CN, CRO, OFX,                       | CIP, AK         |
| <b>Clinical <i>Neisseria gonorrhoeae</i> 16D1170</b> | P, AMP, AML, NA, FMQ, OFX, TE, SXT, FD,               | AMC, CRO, AN, CN, CRO, E, F         | CIP,            |
| <b>Clinical <i>Staphylococcus aureus</i> 18K1052</b> | P, AMP, AMX, AMC, CRO, CIP, NA, FMQ, OFX              | KF, CXM, AN, GN, E, SXT, FD, IPM, F | -               |
| <b>Clinical <i>Enterococcus faecalis</i> 18K1386</b> | P, AMP, KF, CXM, CRO, AN, GN, CIP, NA, FMQ, OFX, E,FD | AMX, AMC, SXT,F                     | IPM             |

AMC: Amoxicillin + Ac.clavulanic; P: penicillin G; AMP: Ampicillin; KF: Cefalotin; CRO: Ceftriaxone; AN: Amikacin; CN: Gentamicin; CIP: Ciprofloxacin; NA: Alidixicacid; FMQ: Flumequie; OFX: Ofolxacin; E: Erythromycin; TE: Tetracycline SXT: Trimethoprim+Sulfamide; FD: Fusidicacid; F: Nitrofurantne; CXM: Cefuroxin; VA: Vaomycin; CTX: Cefotaxime. IPM:Imipenem; CAZ: Ceftazidim; TM: Tobramycin; FOX: Cefoxitin; TIC: Ticarcillin

## References

1. Bouaziz, S. *et al.* Antifungal activity of *Streptomyces* sp.14 strain isolated from Ouargla (Southeast of Algeria): identification, production and characterization of the active substance. *Int. J. Biosci.* **9**, 45–56 (2016).
2. Das, R., Romi, W., Das, R., Sharma, H. K. & Thakur, D. Antimicrobial potentiality of *Actinobacteria* isolated from two microbiologically unexplored forest ecosystems of Northeast India. *BMC Microbiol.* **18**, 1–16 (2018).
3. Thakur, D., Yadav, A., Gogoi, B. K. & Bora, T. C. Isolation and screening of *Streptomyces* in soil of protected forest areas from the states of Assam and Tripura, India, for antimicrobial metabolites. *J. Mycol. Med.* **17**, 242–249 (2007).
4. Lee, E. J., Hwang, K. Y., Lee, H. S. & Chung, N. Characterization of a new *Streptomyces* sp. a1022 as a potential biocontrol agent. *J. Appl. Biol. Chem.* **54**, 488–493 (2011).
5. Badji, B., Riba, A., Mathieu, F., Lebrihi, A. & Sabaou, N. Activité antifongique d'une souche d'*Actinomadura* d'origine saharienne sur divers champignons pathogènes et toxigènes. *J. Mycol. Med.* **15**, 211–219 (2005).
6. Rossi-Tamisier, M., Benamar, S., Raoult, D. & Fournier, P. E. Cautionary tale of using 16s rRNA gene sequence similarity values in identification of human-associated bacterial species. *Int. J. Syst. Evol. Microbiol.* **65**, 1929–1934 (2015).
